# Supplementary material for: Integrated Metabolomics and Network Pharmacology Study on Immunoregulation Mechanisms ofPanax ginsengthrough Macrophages
Source: Hindawi journal article supplement (doi:10.1155/2019/3630260), 2019-06-25
Supplement: f1 [file 3630260.f1.pdf]

### Supplementary Materials:

The influence of different incubation time (0.5, 1, 2, 3 h) was studied when the GFP-*E. coli* number/cell number was 50. The other conditions are the same as the content of **2.4 High content screening analyses of phagocytosis activity**. The average phagocytic index sustained increased in 0.5-2 h incubating but decreased at 3h, so we incubated for 2 h (Figure 1 A). Then we study influence of different GFP-*E. coli* number (GFP-*E. coli* number/cell number was from 12.5 to 500). As shown in Figure S1 B and C, The average phagocytic index increased when the GFP-*E. coli* number/cell number was from 12.5 to 400, while the cell number decreased when GFP-*E. coli* number/cell number was 200. Therefore, the GFP-*E. coli* number/cell number was determined to be 100 and incubation time was 2 h.

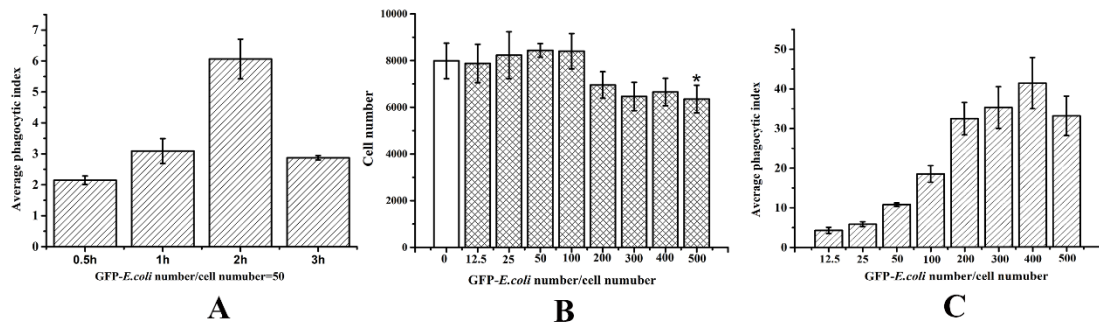

**FIGURE S1:** The study on methodology of phagocytosis activity. (A) The average phagocytic index of macrophage in different time incubating with GFP-*E. coli*. (B, C) The cell number and average phagocytic index when the GFP-*E. coli* number/cell number was from 12.5 to 400. \* $P < 0.05$  vs the group without GFP-*E. coli*.

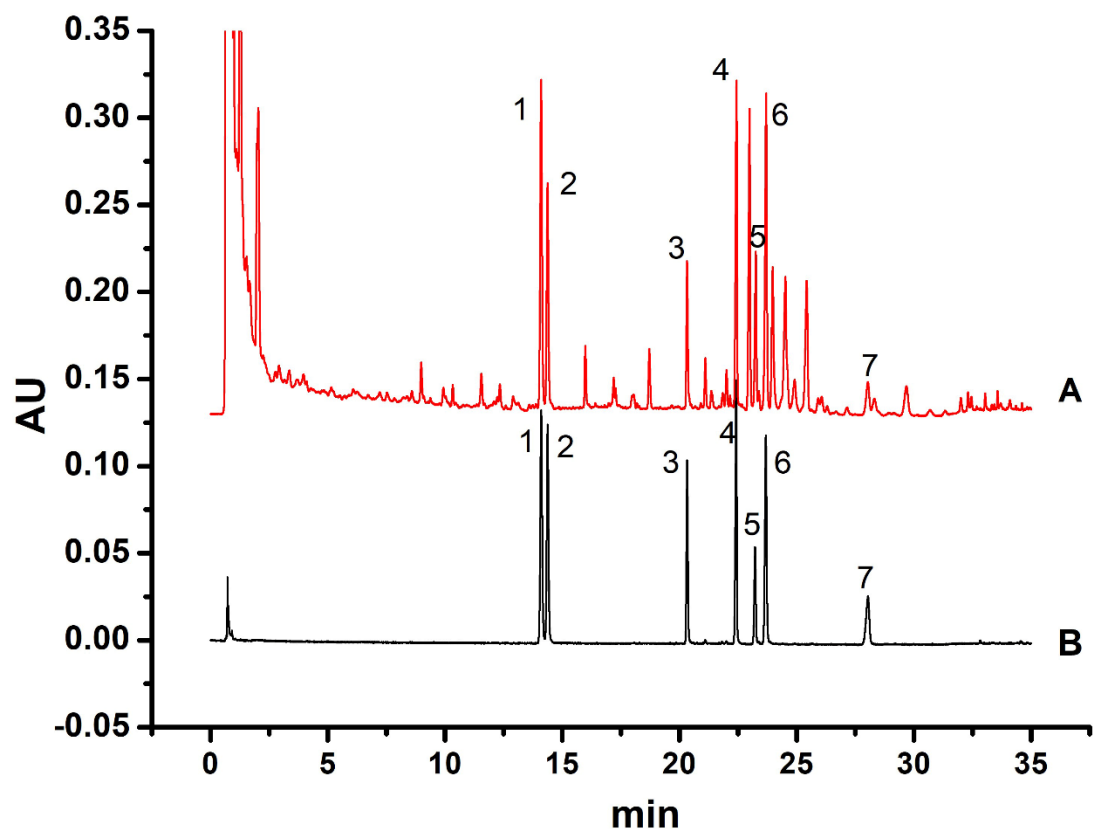

**FIGURE S2:** UPLC ginsenoside profile of PG: (A) PG extract; (B) Standards. Detection at 203 nm wavelength. Peaks: (1) ginsenoside Rg1; (2) ginsenoside Re; (3) ginsenoside Rf; (4) ginsenosideRb1; (5) ginsenoside Rc; (6) ginsenoside Ro; (7) ginsenoside Rd.

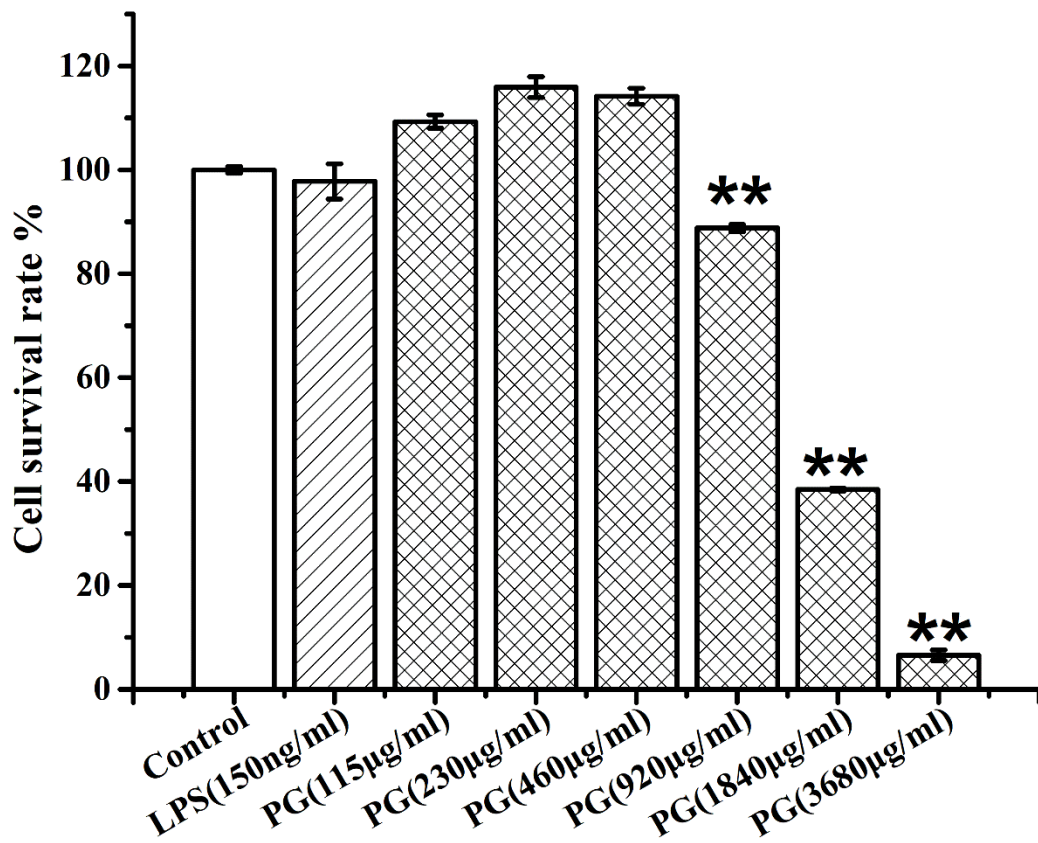

**FIGURE S3:** Macrophage survival rate of co-treatment with PG extracts (115-3680 µg/ml) and the LPS (150 ng/ml), detected by CCK8 method. \*\* $P < 0.01$  vs control group.

**TABLE S1:** The information of potential biomarkers.

| Metabolites                         | KEGG ID | Pathway                                     |
|-------------------------------------|---------|---------------------------------------------|
| Data from the ESI- mode             |         |                                             |
| OPC6-CoA                            | C16331  | alpha-Linolenic acid metabolism             |
| trans-2-Enoyl-OPC6-CoA              | C16332  | alpha-Linolenic acid metabolism             |
| PC(18:3(9Z,12Z,15Z)/15:0)           | C00157  | Glycerophospholipid metabolism              |
| PS(18:0/20:4(8Z,11Z,14Z,17Z))       | C02737  | Glycerophospholipid metabolism              |
| Phosphorylcholine                   | C00588  | Glycerophospholipid metabolism              |
| PE(18:0/16:1(9Z))                   | C00350  | Glycerophospholipid metabolism              |
| Glucosylceramide (d18:1/16:0)       | C01190  | Sphingolipid metabolism                     |
| Ceramide (d18:1/20:0)               | C00195  | Sphingolipid metabolism                     |
| 2'-Deoxycytidine diphosphate (dCDP) | C00705  | Pyrimidine metabolism                       |
| Xanthylic acid (XMP)                | C00655  | Purine metabolism                           |
| Deoxyadenosine monophosphate (dAMP) | C00360  | Purine metabolism                           |
| 3'-Phosphoadenylyl sulfate (PAPS)   | C00053  | Purine metabolism                           |
| Glutathione                         | C00051  | Glutathione metabolism                      |
| Taurine                             | C00245  | Taurine and hypotaurine metabolism          |
| Inosine 5'-monophosphate (IMP)      | C00130  | Purine metabolism                           |
| (S)-3-Hydroxytetradecanoyl-CoA      | C05260  | Fatty acid degradation                      |
| (S)-3-Hydroxyhexadecanoyl-CoA       | C05258  | Fatty acid degradation                      |
| Data from the ESI+ mode             |         |                                             |
| Choline                             | C00114  | Glycine, serine and threonine metabolism    |
| Creatine                            | C00300  | Glycine, serine and threonine metabolism    |
| L-IsoLeucine                        | C00123  | Valine, leucine and isoleucine biosynthesis |

**TABLE S2:** Parameters of PCA and OPLS-DA models.

| Model No.         | Model type | Groups included   | Component | R2X   | R2Y (cum) | Q2Y (cum) |
|-------------------|------------|-------------------|-----------|-------|-----------|-----------|
| Data of ESI- mode |            |                   |           |       |           |           |
| M1                | PCA        | -                 | 2         | 0.657 | -         | 0.455     |
| M2                | OPLS-DA    | PG-High & Control | 1+1+0     | 0.837 | 0.999     | 0.985     |
| Data of ESI+ mode |            |                   |           |       |           |           |
| M3                | PCA        | -                 | 3         | 0.641 | -         | 0.153     |
| M4                | OPLS-DA    | PG-High & Control | 1+3+0     | 0.891 | 1         | 0.982     |

**TABLE S3:** Results from pathway analysis of potential biomarkers with MetaboAnalyst 3.0.

| Pathway name                                           | Total | Hits | RAW p    | FDR      | Impact  |
|--------------------------------------------------------|-------|------|----------|----------|---------|
| Glycerophospholipid metabolism                         | 30    | 5    | 4.83E-05 | 0.003964 | 0.32284 |
| alpha-Linolenic acid metabolism                        | 9     | 3    | 0.000223 | 0.009139 | 0       |
| Purine metabolism                                      | 68    | 4    | 0.015644 | 0.4276   | 0.08939 |
| Sphingolipid metabolism                                | 21    | 2    | 0.03709  | 0.76034  | 0.32331 |
| Fatty acid elongation in mitochondria                  | 27    | 2    | 0.058781 | 0.87982  | 0.08606 |
| Sulfur metabolism                                      | 5     | 1    | 0.072035 | 0.87982  | 0.3     |
| Glycine, serine and threonine metabolism               | 31    | 2    | 0.075169 | 0.87982  | 0       |
| Linoleic acid metabolism                               | 6     | 1    | 0.085836 | 0.87982  | 0       |
| Fatty acid metabolism                                  | 39    | 2    | 0.11165  | 0.9254   | 0.08739 |
| Taurine and hypotaurine metabolism                     | 8     | 1    | 0.11285  | 0.9254   | 0.42857 |
| Valine, leucine and isoleucine biosynthesis            | 11    | 1    | 0.15196  | 1        | 0.33333 |
| Glycosylphosphatidylinositol (GPI)-anchor biosynthesis | 14    | 1    | 0.18942  | 1        | 0.0439  |
| Glutathione metabolism                                 | 26    | 1    | 0.32409  | 1        | 0.36069 |
| Arachidonic acid metabolism                            | 36    | 1    | 0.41976  | 1        | 0       |
| Valine, leucine and isoleucine degradation             | 38    | 1    | 0.43728  | 1        | 0       |
| Pyrimidine metabolism                                  | 41    | 1    | 0.46262  | 1        | 0.0364  |
| Arginine and proline metabolism                        | 44    | 1    | 0.48687  | 1        | 0.01198 |
| Primary bile acid biosynthesis                         | 46    | 1    | 0.50245  | 1        | 0.02976 |
| Aminoacyl-tRNA biosynthesis                            | 69    | 1    | 0.65215  | 1        | 0       |
| Steroid hormone biosynthesis                           | 72    | 1    | 0.66817  | 1        | 0.02711 |

**TABLE S4:** The ADME indexes of PG's ingredients by network pharmacology analyses.

| Molecule name                                                    | OB (%) | Caco-2 | DL   |
|------------------------------------------------------------------|--------|--------|------|
| Malonic acid                                                     | 21.69  | -0.23  | 0.01 |
| Tridecanoic acid                                                 | 22.32  | 1.04   | 0.05 |
| Stigmasterol                                                     | 43.83  | 1.44   | 0.76 |
| beta-Elemene                                                     | 25.63  | 1.84   | 0.06 |
| 3-Ethyl-3-methylheptane                                          | 37.33  | 1.81   | 0.02 |
| beta-Sitosterol                                                  | 36.91  | 1.32   | 0.75 |
| Neohexane                                                        | 37.81  | 1.77   | 0.01 |
| Frutinone A                                                      | 65.9   | 0.89   | 0.34 |
| Humulene oxide                                                   | 23.66  | 1.58   | 0.1  |
| Kaempferol                                                       | 41.88  | 0.26   | 0.24 |
| Vulgarin                                                         | 29.21  | 0.03   | 0.2  |
| Mannose-b                                                        | 43.04  | -1.82  | 0.04 |
| 3-methylheptane                                                  | 37.1   | 1.8    | 0.01 |
| (2S,3S,4S,5S,6S)-3,4,5,6-tetrahydroxoxane-2-carboxylic acid(MAV) | 56.17  | -2.14  | 0.06 |
| Ginsenoside Rb2                                                  | 6.02   | -3.92  | 0.04 |
| Ginsenoside Re                                                   | 4.27   | -3.2   | 0.12 |
| Ginsenoside Rc                                                   | 8.16   | -3.97  | 0.04 |
| Ginsenoside Rg1                                                  | 10.2   | 0.12   | 0.78 |
| Ginsenoside Rg2                                                  | 20.12  | -0.04  | 0.82 |
| <u>Ginsenoside Rb1</u>                                           | 6.24   | -3.99  | 0.04 |

**TABLE S5:** The details of metabolic proteins through network pharmacology analyses.

| UniProt ID | Protein name                             |
|------------|------------------------------------------|
| P47712     | Cytosolic phospholipase A2               |
| Q15596     | Nuclear receptor coactivator 2           |
| P38936     | Cyclin-dependent kinase inhibitor 1      |
| P28161     | Glutathione S-transferase Mu 2           |
| P09211     | Glutathione S-transferase P              |
| P09488     | Glutathione S-transferase Mu 1           |
| P22303     | Acetylcholinesterase                     |
| P06276     | Cholinesterase                           |
| P11217     | Glycogen phosphorylase, muscle form      |
| P30520     | Adenylosuccinate synthetase isozyme 2    |
| Q9Y6K0     | Choline/ethanolaminephosphotransferase 1 |

**TABLE S6: Proteins in M1 and M2 macrophage associated with potential biomarkers of PG.**

| Protein ID          | Gene Symbol | Description                                          |
|---------------------|-------------|------------------------------------------------------|
| M1                  |             |                                                      |
| P37238              | Pparg       | Peroxisome proliferator activated receptor gamma     |
| M2                  |             |                                                      |
| P58681              | Tlr7        | Toll like receptor 7                                 |
| Q61503              | Nt5e        | 5'-Nucleotidase ecto                                 |
| P70206              | Plxna1      | Plexin A1                                            |
| P12025              | Mdk         | Midkine                                              |
| P70207              | Plxna2      | Plexin A2                                            |
| P07141              | Csf1        | Colony stimulating factor 1                          |
| Q62151              | Ager        | Advanced glycosylation end-product specific receptor |
| O88786              | Il13ra2     | Interleukin 13 receptor subunit alpha 2              |
| P20109              | Il13        | Interleukin 13                                       |
| P07214              | Sparc       | Secreted protein acidic and cysteine rich            |
| P14901              | Hmox1       | Heme oxygenase 1                                     |
| P16045              | Lgals1      | Galectin 1                                           |
| P52633              | Stat6       | Signal transducer and activator of transcription 6   |
| P13504              | Il1r1       | Interleukin 1 receptor type 1                        |
| P09803              | Cdh1        | Cadherin 1                                           |
| P11835              | Itgb2       | Integrin subunit beta 2                              |
| P21981              | Tgm2        | Transglutaminase 2                                   |
| ENSMUSG00000055170  | Ifng        | Interferon gamma                                     |
| Q9WVH4              | Foxo3       | Forkhead box o3                                      |
| P42227              | Stat3       | Signal transducer and activator of transcription 3   |
| P42225              | Stat1       | Signal transducer and activator of transcription 1   |
| P25799              | Nfkb1       | nuclear factor kappa B subunit 1                     |
| P11276              | Fn1         | Fibronectin 1                                        |
| P35441              | Thbs1       | Thrombospondin 1                                     |
| P26231              | Ctnna1      | Catenin alpha 1                                      |
| Q61362              | Chi3l1      | Chitinase 3 like 1                                   |
| ENSMUSG00000002603  | Tgfb1       | Transforming growth factor beta 1                    |
| Q02248              | Ctnnb1      | Catenin beta 1                                       |
| Q9R1E0              | Foxo1       | Forkhead box o1                                      |
| Q61221              | Hif1a       | Hypoxia inducible factor 1 subunit alpha             |
| Both M1 and M2      |             |                                                      |
| ENSMUSG00000000869  | Il4         | Interleukin 4                                        |
| Q61176              | Arg1        | Arginase 1                                           |
| ENSMUSG000000025746 | Il6         | Interleukin 6                                        |
| P31041              | Cd28        | CD28 molecule                                        |

|        |       |                                            |
|--------|-------|--------------------------------------------|
| Q8K4B2 | Irak3 | Interleukin 1 receptor associated kinase 3 |
| P06804 | Tnf   | Tumor necrosis factor                      |
| P29477 | Nos2  | Nitric oxide synthase 2                    |

---
